# Supplementary material for: A deep learning method for HLA imputation and trans-ethnic MHC fine-mapping of type 1 diabetes
Source: PubMed Central journal article supplement (PMC7955122; doi:10.1038/s41467-021-21975-x), 2021-03-12
Supplement: 41467_2021_21975_MOESM2_ESM.pdf [file 41467_2021_21975_MOESM2_ESM.pdf]

## **Description of Additional Supplementary Files**

File name: Supplementary Data 1.

Description: Detailed association results of the HLA variants in the MHC region on T1D.

File Name: Supplementary Data 2.

Description: Stepwise conditional association results in HLA-DRB1, -DQA1, and -DQB1 on T1D risk.

File Name: Supplementary Data 3.

Description: A correspondence table of amino acid polymorphisms and 4-digit classical HLA alleles is provided in an excel file format. It includes 4-digit classical alleles with a frequency >1% in either Europeans or Japanese populations based on the reference panels.
